# Supplementary material
Source: publisher site journal article supplement (https://www.dovepress.com/article/241250)
Supplement: Supplementary file 1 [file get_supplementary_file.php]

Appendix 1. Form used for data collection and resident performance evaluation.

**EVALUATION FORM**

Date: / /

Attending surgeon:

Resident level:

R1 R2 R3 R4

Resident prior experience (number of surgeries):

Patient age and gender:

Difficulty of the surgery:

- Straightforward
- Difficult because of :

-Small pupil -hard nucleus - loose zonule - small fissure - deep-set eye

-Behavioral factors - other:…………………………………………………………………………………….

Proficiency grade:

|  | Not done | Done with extensive assistance  (>50%) | Done with minimal assistance  (<50%) | Done proficiently without assistance |
| --- | --- | --- | --- | --- |
| Wound construction |  |  |  |  |
| Capsulorhexis |  |  |  |  |
| Hydrodissection |  |  |  |  |
| Nucleus sculpting |  |  |  |  |
| Nucleus disassembly |  |  |  |  |
| Nucleus removal |  |  |  |  |
| Cortical removal |  |  |  |  |
| IOL folding |  |  |  |  |
| IOL insertion |  |  |  |  |
| Viscoelastic removal |  |  |  |  |
| Wound integrity |  |  |  |  |

Complications: ……………………………………………………………………………………………..

Step:………………………………………………………………………………………………………..

Managed by: - consultant -resident
